# Supplementary material
Source: PubMed Central journal article supplement (PMC9167290)

# Fatigue Assessment Scale (FAS)

Gender:  male  female

Age (in years):

***The following ten statements refer to how you usually feel. Per statement you can choose one out of five answer categories, varying from Never to Always. Please give an answer to each question, even if you do not have any complaints at the moment: Never, Sometimes (about monthly or less); Regularly (about a few times a month); Often (about weekly) and Always (about every day).***

1. I am bothered by fatigue.

Never  Sometimes  Regularly  Often  Always

2. I get tired very quickly.

Never  Sometimes  Regularly  Often  Always

3. I don't do much during the day.

Never  Sometimes  Regularly  Often  Always

4. I have enough energy for everyday life.

Never  Sometimes  Regularly  Often  Always

5. Physically, I feel exhausted.

Never  Sometimes  Regularly  Often  Always

6. I have problems to start things.

Never  Sometimes  Regularly  Often  Always

7. I have problems to think clearly.

Never       Sometimes       Regularly       Often       Always

8. I feel no desire to do anything.

Never       Sometimes       Regularly       Often       Always

9. Mentally, I feel exhausted.

Never       Sometimes       Regularly       Often       Always

10. When I am doing something, I can concentrate quite well.

Never       Sometimes       Regularly       Often       Always

**When all questions are answered, please push the button >>**

Ready

© ild care foundation; [www.ildcare.nl](http://www.ildcare.nl); is only allowed with the permission of the ild care foundation: [info@ildcare.nl](mailto:info@ildcare.nl).  
Developed by [Gosker Digital Solutions](#).

Referenties:

Drent M, Lower EE, De Vries J. Sarcoidosis-associated fatigue. Eur Respir J 2012; 40: 255–263.  
<http://www.ncbi.nlm.nih.gov/pubmed/22441750>

Kleijn WPE, De Vries J, Wijnen PAHM, Drent M. Minimal (clinically) important differences for the Fatigue Assessment Scale in sarcoidosis. Respir Med 2011; 105: 1388-95. <http://www.ncbi.nlm.nih.gov/pubmed/21700440>

De Vries, Michielsen H, Van Heck GL, Drent M. Measuring fatigue in sarcoidosis: the Fatigue Assessment Scale (FAS). Br J Health Psychol 2004; 9: 279-91. <http://www.ncbi.nlm.nih.gov/pubmed/15296678>

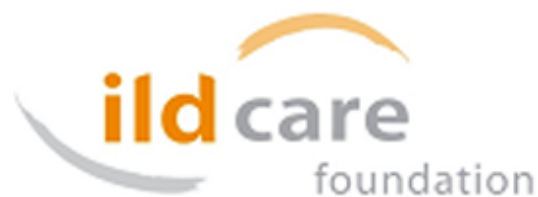

Supplement: 41598_2022_13542_MOESM1_ESM.pdf [file 41598_2022_13542_MOESM1_ESM.pdf]
